# Supplementary material for: An engineered antibody fragment targeting mutant β-catenin via major histocompatibility complex I neoantigen presentation
Source: PubMed Central journal article supplement (PMC6916501; doi:10.1074/jbc.ra119.010251), 2019-11-05
Supplement: supp_RA119.010251_154397_2_supp_418434_pzxqvp.pdf [file supp_RA119.010251_154397_2_supp_418434_pzxqvp.pdf]

# Supporting Information

An engineered antibody fragment targeting mutant  $\beta$ -catenin via HLA neoantigen presentation

**Michelle S. Miller<sup>1‡</sup>, Jacqueline Douglass<sup>2‡</sup>, Michael S. Hwang<sup>2</sup>, Andrew D. Skora<sup>2#</sup>, Michael Murphy<sup>3</sup>, Nickolas Papadopoulos<sup>2</sup>, Kenneth W. Kinzler<sup>2</sup>, Bert Vogelstein<sup>2,4</sup>, Shibin Zhou<sup>2</sup>, Sandra B. Gabelli<sup>1,5,6\*</sup>**

From the <sup>1</sup>Department of Oncology, Johns Hopkins University School of Medicine, Baltimore, MD, 21287, USA; <sup>2</sup>Ludwig Center, Sidney Kimmel Comprehensive Cancer Center, Johns Hopkins University School of Medicine, Baltimore, MD, 21287, USA; <sup>3</sup>GE Healthcare Life Sciences, 100 Results Way, Marlborough, MA, 01752, USA; <sup>4</sup>Howard Hughes Medical Institute, Johns Hopkins University School of Medicine, Baltimore, MD, 21287, USA; <sup>5</sup>Department of Medicine, Johns Hopkins University School of Medicine, Baltimore, MD, 21287, USA; <sup>6</sup>Department of Biophysics and Biophysical Chemistry, Johns Hopkins University School of Medicine, Baltimore, MD, 21205, USA

Running title: *Targeting mutant  $\beta$ -catenin*

<sup>#</sup>Present address: Lilly Biotechnology Center, Eli Lilly and Co, San Diego, CA, 92121, USA

<sup>‡</sup>These authors contributed equally to this work.

\*To whom correspondence should be addressed: Sandra B. Gabelli: Johns Hopkins University School of Medicine, Baltimore, MD, 21205, USA; [gabelli@jhmi.edu](mailto:gabelli@jhmi.edu)

**Fig. S1. 2mFo-DFc map of  $\beta$ -catenin S45F mutant peptide. A.**

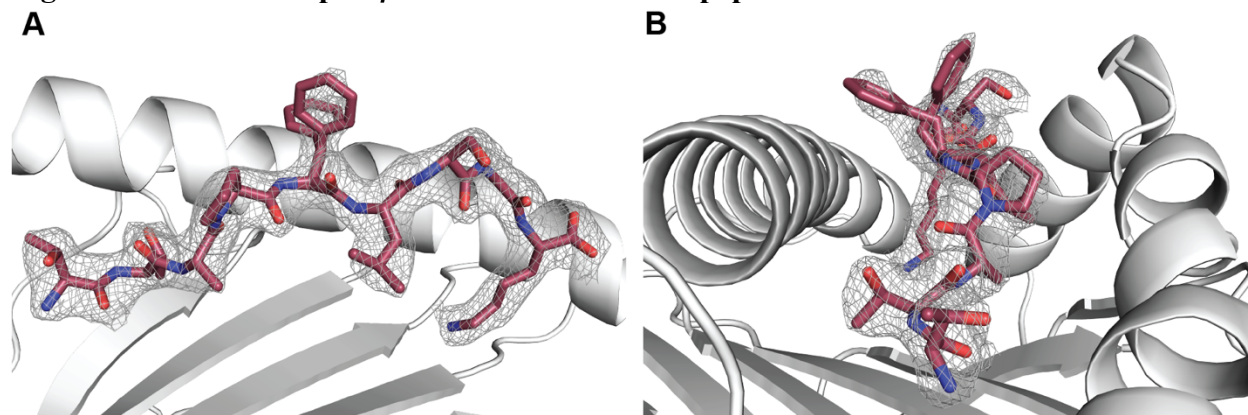

**Fig. S2. Amino acid sequences of S45F mutant  $\beta$ -catenin<sub>41-49</sub>pHLA-A\*03:01 specific scFvs.**

**E10**

DIQMTQSPSSLSASVGDRVTITCRASQDVNTAVAWYQQKPGKAPKLLIYSASFLYSGVPSRFSGSRSGTDFTL  
TISSLQPEDFATYYCQQSYSPPTFGQGTKVEIKRTGGGSGGGGASEVQLVESGGGLVQPGGSLRLSCAASGFN  
INNTYIHWVRQAPGKGLEWVASIYPTDGYTRYADSVKGRFTISADTSKNTAYLQMNSLRAEDTAVYYCSRTY  
YSYYSAMDVWGQGTLVTVSS

**cl. 3**

DIQMTQSPSSLSASVGDRVTITCRASQDVNTAVAWYQQKPGKAPKLLIYSAYFLYSGVPSRFSGSRSGTDFTL  
TISSLQPEDFATYYCQQIYTSPITFGQGTKVEIKRTGGGSGGGGSGGGASEVQLVESGGGLVQPGGSLRLSCA  
ASGFNFITGMHWVRQAPGKGLEWVARIGPGSDYTNYADSVKGRFTISADTSKNTAYLQMNSLRAEDTAV  
YYCSRYYYASALDYWGQGTLVTVSS

**cl. 4**

DIQMTQSPSSLSASVGDRVTITCRASQDVNTAVAWYQQKPGKAPKLLIYSASFLYSGVPSRFSGSRSGTDFTL  
TISSLQPEDFATYYCQQRAYFPITFGQGTKVEIKRTGGGSGGGGSGGGASEVQLVESGGGLVQPGGSLRLSC  
AASGFNFSDYGMHWVRQAPGKGLEWVAMLIPASGYTNYADSVKGRFTISADTSKNTAYLQMNSLRAEDTA  
VYYCSRGSYMDYWGQGTLVTVSS

**cl. 7**

DIQMTQSPSSLSASVGDRVTITCRASQDVNTAVAWYQQKPGKAPKLLIYSASFLYSGVPSRFSGSRSGTDFTL  
TISSLQPEDFATYYCQQYAYTPITFGQGTKVEIKRTGGGSGGGGSGGGASEVQLVESGGGLVQPGGSLRLS  
CAASGFNVWSYGIHWVRQAPGKGLEWVAGVTPDGSYTYADSVKGRFTISADTSKNTAYLQMNSLRAEDT  
AVYYCSRSGWAMDYWGQGTLVTVSS

**cl. 9**

DIQMTQSPSSLSASVGDRVTITCRASQDVNTAVAWYQQKPGKAPKLLIYSAYFLYSGVPSRFSGSRSGTDFTL  
TISSLQPEDFATYYCQQIHYKPLTFGQGTKVEIKRTGGGSGGGGSGGGASEVQLVESGGGLVQPGGSLRLSCA  
ASGFNVAWYSIHWVRQAPGKGLEWVAQVYGGSSYTYADSVKGRFTISADTSKNTAYLQMNSLRAEDTAV  
YYCSRDFYSSGMDYWGQGTLVTVSS

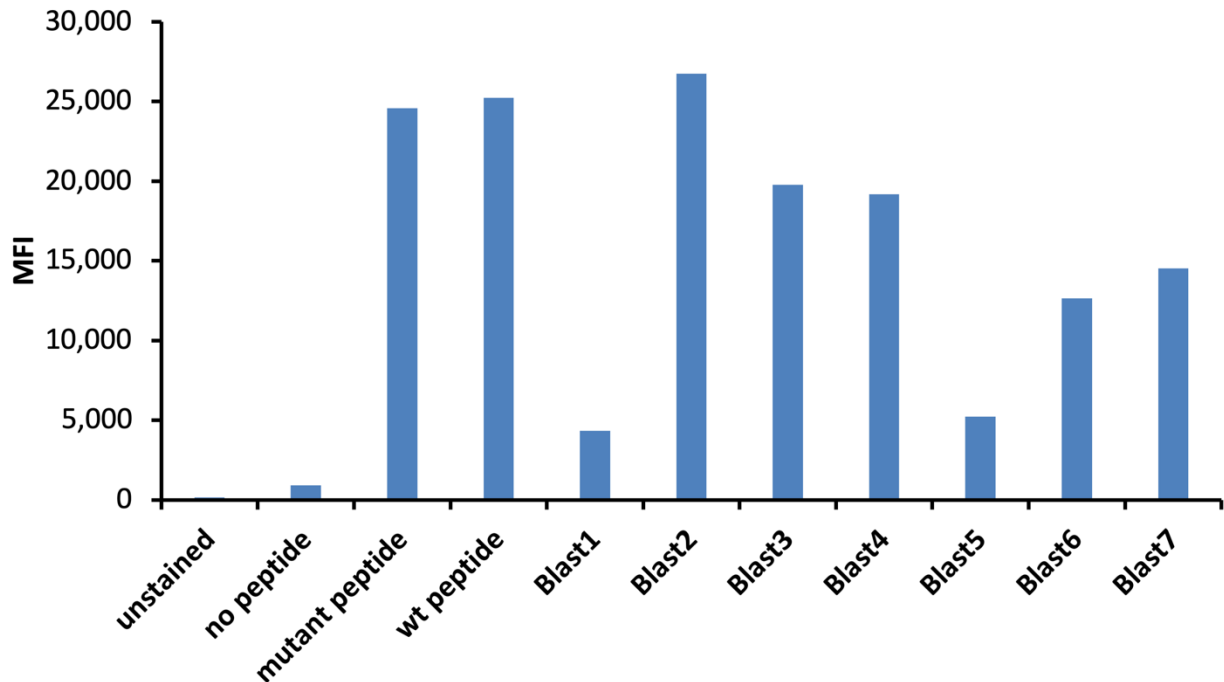

**Fig. S3. Anti-HLA-A3 staining to assess peptide pulsing of CTNNB peptides and BLAST peptides.** T2A3 cells were peptide-pulsed overnight at 37°C in serum-free media with either the CTNNB mutant S45F peptide (TTAPFLSGK) and  $\beta$ 2M, CTNNB wildtype peptide (TTAPSLSGK) and  $\beta$ 2M, or  $\beta$ 2M only. Cells were incubated with anti-HLA-A3 antibody clone GAP.A3 PE conjugate. Cells were stained with a live/dead Near-IR dye, washed, and analyzed by an LSRII flow cytometer.

**Table S1. Blast Peptides.** BLAST peptides were identified by a BLASTp search of the CTNNB S45F mutant peptide (TTAPFLSGK) against the normal human proteome. Hits were then analyzed by netMHCv4.0 for binding to HLA-A\*03:01.

| Peptide Name | Peptide    | Predicted Affinity (nM) | Protein                                                          |
|--------------|------------|-------------------------|------------------------------------------------------------------|
| Blast1       | QLLDFLSGK  | 91.7                    | PCNA-interacting partner isoform 1 [Homo sapiens]                |
| Blast2       | SLNPKFLSGK | 16.9                    | ephrin-B1 precursor [Homo sapiens]                               |
| Blast3       | IIYNFLSGK  | 7.3                     | orexin receptor type 2 isoform X1 [Homo sapiens]                 |
| Blast4       | RTVTFLSGK  | 13.4                    | nuclear receptor subfamily 1, group D, member 2 [Homo sapiens]   |
| Blast5       | TAFDPFLGGK | 178.5                   | heat shock protein 105 kDa isoform 3 [Homo sapiens]              |
| Blast6       | RIIPFLPGK  | 18.0                    | SH3 and PX domain-containing protein 2A isoform 1 [Homo sapiens] |
| Blast7       | IQNPFLSSK  | 60.4                    | SCAN domain-containing protein 3 isoform 1 [Homo sapiens]        |
